# Supplementary material for: Atlantoaxial Misalignment Causes High Blood Pressure in Rats: A Novel Hypertension Model
Source: Hindawi journal article supplement (doi:10.1155/2017/5986957), 2017-01-01
Supplement: f1 [file 5986957.f1.pdf]

**Supplemental Figures.**

**Supplemental Figure 1. Process of making the atlanto-axial disorder rat model.**

A. Skin preparation and disinfection. B. Exposure of the atlantoaxial joint with skin incision. C. Preparation of artificial fixtures. D. Implant the fixtures into atlantoaxial joints. E. Sew back the wound. F. Injection with antibiotics.

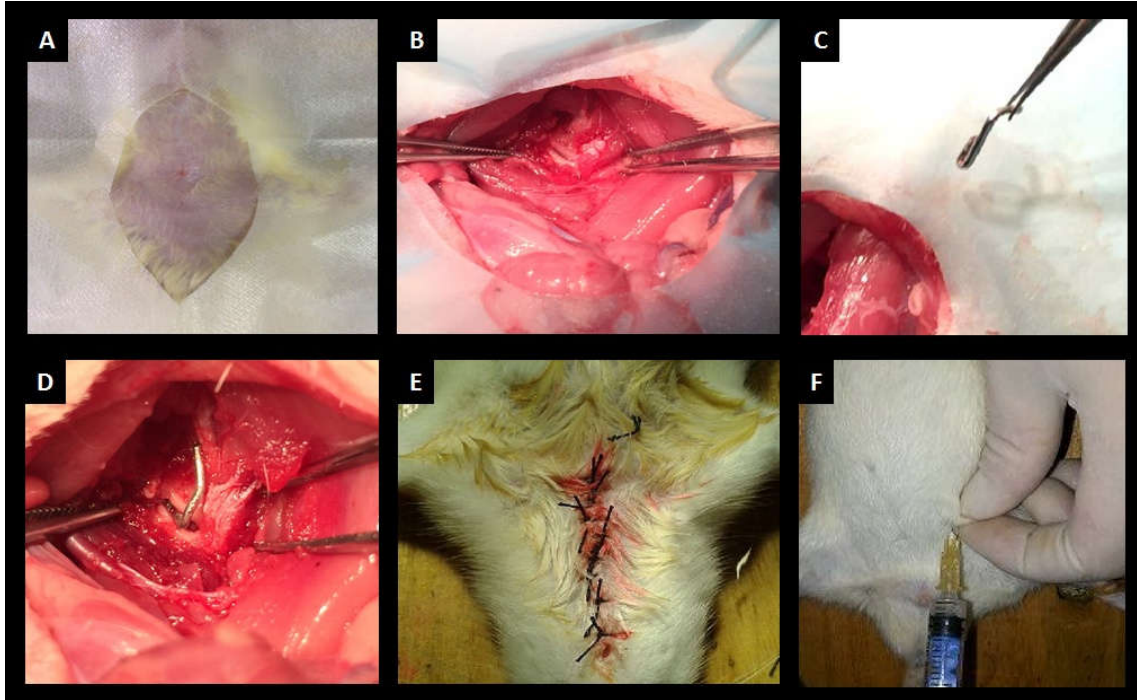

**Supplemental Figure 2. X-ray imaging of the rats.**

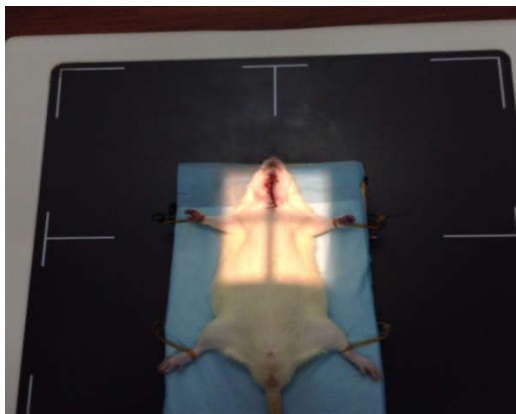

**Supplemental Table 1. Blood pressure changes during modeling process.**

| Date                            | Blood Pressure | Control Group (M ± se) | Sham Group (M ± se) | Left Group (M ± se) | Right Group (M ± se) |
|---------------------------------|----------------|------------------------|---------------------|---------------------|----------------------|
| Before Surgery                  | SBP            | 122.88±2.82            | 123.29±2.6          | 123.11±2.40         | 123.16±2.07          |
|                                 | DBP            | 82.52±2.36             | 82.13±2.64          | 83.13±1.45          | 82.56±1.94           |
| 1st day after surgery           | SBP            | 122.48±2.99            | 122.93±2.70         | 144.00±2.42         | 126.40±2.67          |
|                                 | DBP            | 81.86±2.37             | 82.22±2.47          | 98.03±2.31          | 82.96±3.82           |
| 2nd day after surgery           | SBP            | 122.66±2.99            | 123.46±2.70         | 145.27±3.42         | 131.40±3.67          |
|                                 | DBP            | 81.86±2.97             | 82.22±2.79          | 131.40±3.67         | 88.96±3.82           |
| 3rd day after surgery           | SBP            | 123.95±1.29            | 123.47±1.79         | 149.59±4.73         | 139.42±5.27          |
|                                 | DBP            | 83.86±2.13             | 83.74±2.19          | 104.82±3.73         | 95.38±3.89           |
| 5th day after surgery           | SBP            | 123.2±1.27             | 123.98±1.79         | 155.35±5.82         | 145.46±4.47          |
|                                 | DBP            | 81.86±2.73             | 82.22±2.84          | 108.39±3.69         | 100.21±3.59          |
| 7thday after surgery            | SBP            | 124.62±2.33            | 125.01±1.19         | 155.75±4.62         | 145.39±3.47          |
|                                 | DBP            | 83.06±1.37             | 84.28±1.24          | 107.19±2.39         | 103.21±1.59          |
| 1st day after removing fixtures | SBP            | 123.25±2.47            | 124.79±2.19         | 135.45±3.92         | 132.93±4.87          |
|                                 | DBP            | 82.86±3.13             | 82.34±3.56          | 94.88±2.89          | 87.56±3.97           |
| 2nd day after removing fixtures | SBP            | 124.7±2.76             | 123.19±2.36         | 136.45±2.92         | 128.43±3.17          |
|                                 | DBP            | 84.36±3.13             | 83.34±3.56          | 92.15±2.89          | 89.76±3.39           |
| 5th day after removing fixtures | SBP            | 123.1±3.47             | 123.81±2.04         | 128.69±3.91         | 126.93±2.14          |
|                                 | DBP            | 84.31±2.42             | 83.34±3.26          | 86.12±3.19          | 85.76±3.05           |
| 7th day after removing fixtures | SBP            | 124.47±3.39            | 123.29±2.64         | 127.39±3.37         | 125.63±2.54          |
|                                 | DBP            | 84.58±2.91             | 83.19±3.26          | 84.72±3.51          | 85.96±3.75           |

**Supplemental Table 2. Blood Ach level on 7th day after the surgery.**

| µg/ML                      | Control Group            | Sham Group                            | Left Group                            | Right Group                           |
|----------------------------|--------------------------|---------------------------------------|---------------------------------------|---------------------------------------|
| ACH                        | 506.81±45.71             | 503.94±48.99 <sup>3)</sup>            | 331.52±57.79 <sup>1)</sup>            | 353.62±55.50 <sup>2)</sup>            |
| <a href="#">Heart rate</a> | <a href="#">346±5.81</a> | <a href="#">345±4.29<sup>3)</sup></a> | <a href="#">395±5.27<sup>1)</sup></a> | <a href="#">381±4.31<sup>2)</sup></a> |

Note: 1)  $p < 0.01$ , compared with Sham Group; 2)  $p < 0.01$ , compared with Sham Group.

[3\)  \$p > 0.05\$ , compared with Control Group](#)
